# Supplementary material
Source: publisher figshare collection journal article supplement (https://gsajournals.figshare.com/ndownloader/files/13273004)
Supplement: Supplementary file 1 [file 13273004]

## Sheet: Input list
14-3-3epsilon
14-3-3zeta		1. Enter ID list
Aats-gln		2. Select Organism (Drosophila melanogaster)
Ac78C		3. Statistical overrepresentation test - use default settings
AcCoAS		test = Fisher's exact with FDR multiple test correction; FDR < 0.05
Act42A
Adgf-A
Akap200
alpha-Est10
alpha-Spec
AnnIX
Arpc3B
aru
Atet
Atf3
Baldspot
bark
beta-Spec
betaTub60D
BI-1
bib
blow
SPARC
bwa
c(3)G
CAH2
cbt
CG10062
CG10103
CG10126
CG10178
CG10249
CG10286
CG10433
CG10550
CG10559
CG10621
CG10650
CG10660
CG10824
CG11275
CG1136
CG11791
CG12012
CG12014
CG12290
CG12517
CG12581
CG12730
CG12744
CG13124
CG13321
CG13377
CG13506
CG13510
CG13516
CG13636
CG13667
CG13868
CG14227
CG14701
CG14855
AdamTS-A
CG14879
CG15210
CG15211
CG15347
CG15629
CG1572
CG1600
CG16700
CG17224
CG17323
CG17625
CG17732
CG18067
CG18268
CG18316
CG18545
CG18547
CG18744
CG2064
Cg25C
CG2641
CG30069
CG3014
CG30154
CG30197
CG30269
CG30323
CG30345
CG3091
CG3097
CG31373
CG31436
CG31743
CG3191
CG31955
CG32091
CG32850
CG33158
CG33298
CG3348
CG3397
CG34417
CG42394
CG4250
CG42575
CG42675
CG4269
CG43078
CG43341
CG4338
CG43462
CG44250
CG44325
CG45050
CG46339
CG4797
CG4839
CG5028
CG5059
CG5255
CG5346
CG5390
CG5597
CG5618
CG5707
CG6074
CG6231
CG6340
CG6357
CG6409
CG6424
CG6426
CG6490
CG6891
CG7009
CG7059
CG7133
CG7142
CG7194
CG7497
CG7702
CG7900
CG8369
CG8547
CG8740
CG8965
CG9360
CG9372
CG9498
CG9505
CG9743
CG9894
chrb
ckn
cno
cora
CR43790
CR44953
CR6900
cry
Csk
CSN5
cv-c
cwo
Cyp12d1-d
Cyp6a13
defl
desat1
Dic1
Diedel
dm
dome
drl
Dscam1
E(spl)m3-HLH
E(spl)mbeta-HLH
Ect4
edl
Egfr
elB
emp
ena
f
Fas1
Fas2
Fas3
fax
fng
CG32138
Fs
fz2
GABA-B-R2
Galpha73B
Gfat1
Gli
GM10545
Gpo-1
Gr64b
GstO3
GstT4
h
His2B:CG33868
Hmgs
hoe2
Hr96
Hrb27C
Idgf3
Ilp6
Imp
ImpL2
ImpL3
Inx3
Inx7
Irc
Iris
isoQC
jim
kek1
Ptpmeg2
LamC
LanB1
LanB2
Lasp
laza
LpR2
Lrch
m
MadM
Mbs
Mdr49
Men-b
MESR3
metro
MFS16
Mgat2
mid
Mmp2
modSP
mp
msn
Msp300
mthl3
mthl4
mthl8
MtnA
MtnB
Nf-YA
NK7.1
NKAIN
Nmdmc
noc
nord
Npc2b
NT5E-2
Oatp74D
Obp46a
Obp99a
ogre
p130CAS
pain
EbpIII
Pepck
PGRP-LA
PGRP-LC
Phk-3
phm
pico
Pka-C2
Pka-R2
pnt
Ppa
ppk29
Ppn
Prosap
pst
Pvr
rgn
Rho1
RpL30
RpL38
scb
sei
Sema1b
SH3PX1
Sk1
Smox
Sobp
Socs36E
SP1173
spn-F
Spn42Dd
Src64B
Ssk
stet
Strn-Mlck
stv
sty
Sulf1
Syp
Syx4
Tep4
Thor
Tis11
TotA
TotM
trol
tsl
Tsp42Ed
Tsp42Ee
Uhg5
upd1
ush
vir-1
zip
Zw

## Sheet: Cellular Component
	Drosophila melanogaster (REF)	Client Text Box Input
PANTHER GO-Slim Cellular Component	#	#	expected	Fold Enrichment	+/-	raw P value	FDR
extracellular matrix	29	6	0.58	10.31	+	5.51e-05	0.00341
integral to membrane	559	23	11.21	2.05	+	0.00184	0.0379
plasma membrane	593	23	11.9	1.93	+	0.00413	0.0427
cell part	3347	47	67.15	0.7	-	0.00444	0.0393
macromolecular complex	1372	13	27.53	0.47	-	0.00213	0.033
nucleus	1096	9	21.99	0.41	-	0.00216	0.0268
organelle	2272	26	45.58	0.57	-	0.000982	0.0304

## Sheet: Protein Class
	Drosophila melanogaster (REF)	Client Text Box Input)
PANTHER Protein Class	#	#	expected	Fold Enrichment	+/-	raw P value	FDR
extracellular matrix protein	58	7	1.16	6.02	+	0.000277	0.0549
protease inhibitor	182	12	3.65	3.29	+	0.000463	0.0458

## Sheet: Biological Process
	Drosophila melanogaster (REF)	Client Text Box Input
PANTHER GO-Slim Biological Process	#	#	expected	Fold Enrichment	+/-	raw P value	FDR
negative regulation of apoptotic process	28	5	0.56	8.9	+	0.000429	0.0242
developmental process	372	18	7.46	2.41	+	0.00111	0.042
cell differentiation	111	9	2.23	4.04	+	0.000603	0.0272
cell surface receptor signaling pathway	260	15	5.22	2.88	+	0.000365	0.0275
signal transduction	610	32	12.24	2.61	+	1.26e-06	0.000284
cell communication	733	35	14.71	2.38	+	3.14e-06	0.000355
